# Supplementary material for: Growth and properties of large-area sulfur-doped graphene films
Source: Royal Society of Chemistry journal article supplement (doi:10.1039/c7tc00447h), 2017-01-01
Supplement: c7tc00447h1.pdf [file c7tc00447h1.pdf]

## Supporting Information

### **Growth and properties of large-area sulfur-doped graphene films**

Jinhao Zhou,<sup>a</sup> Zegao Wang,<sup>a,b\*</sup> Yuanfu Chen,<sup>a\*</sup> Jingbo Liu,<sup>c</sup> Binjie Zheng,<sup>a</sup> Wanli Zhang,<sup>a</sup> and Yanrong Li<sup>a</sup>

<sup>a</sup> *State Key Laboratory of Electronic Thin Films and Integrated Devices, University of Electronic Science and Technology of China, Chengdu 610054, PR China.*

<sup>b</sup> *Interdisciplinary Nanoscience Center (iNANO), Aarhus University, DK, Aarhus City, Denmark*

<sup>c</sup> *Energy Conversion R&D Center, Central Academy of Dongfang Electric Corporation, Chengdu 611731, PR China.*

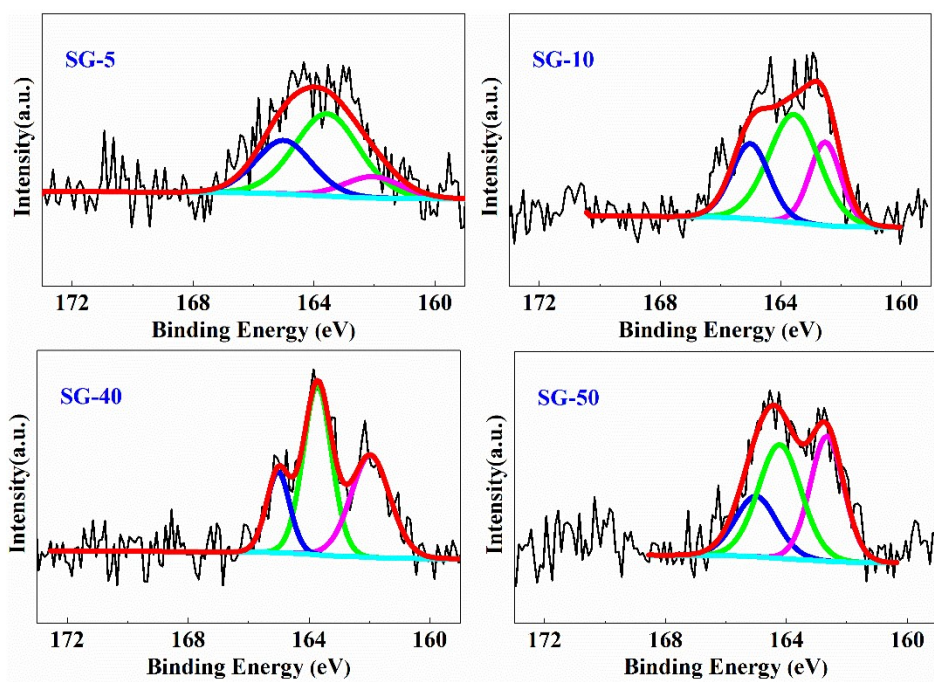

Figure S1. S<sub>2p</sub> XPS spectra of SG-5, SG-10, SG-40 and SG-50, respectively.

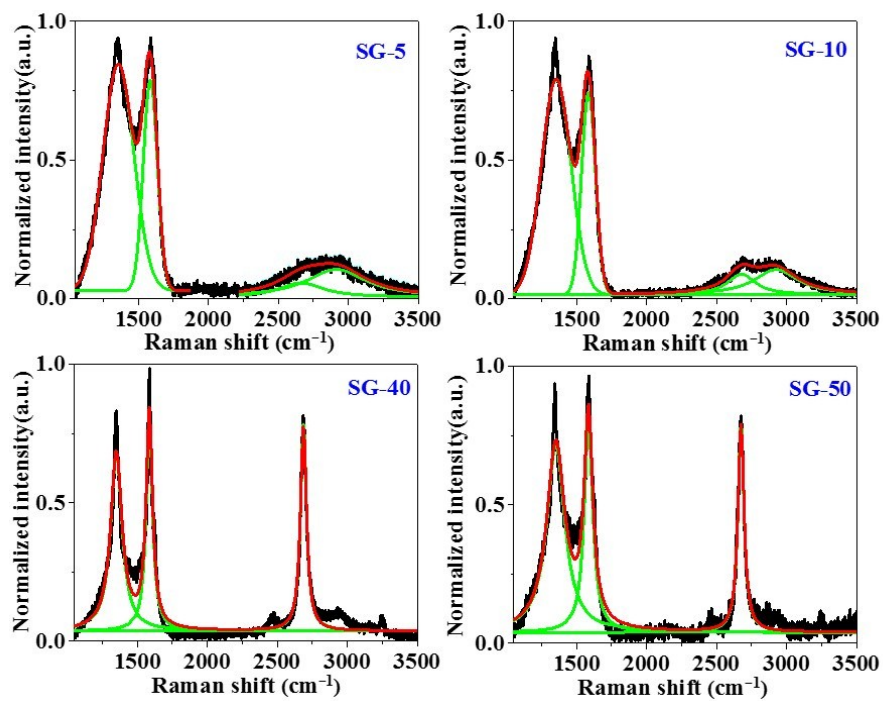

Figure S2. Raman spectra and their Lorentzian fits of SG with different hydrogen flux.

Table S1. Detail parameters of Raman spectra collected from the Lorentzian fits of SG samples

| Sample | D band<br>(cm <sup>-1</sup> ) | G band<br>(cm <sup>-1</sup> ) | 2D band<br>(cm <sup>-1</sup> ) | I <sub>2D</sub> | FWHM(2D)<br>(cm <sup>-1</sup> ) | I <sub>2D</sub> /I <sub>G</sub> | I <sub>D</sub> /I <sub>G</sub> | L <sub>D</sub> (nm) |
|--------|-------------------------------|-------------------------------|--------------------------------|-----------------|---------------------------------|---------------------------------|--------------------------------|---------------------|
| SG-5   | 1357.21                       | 1585.79                       | 2679.10                        | 0.06            | 256.59                          | 0.08                            | 1.05                           | 11.71               |
| SG-10  | 1354.17                       | 1584.76                       | 2677.66                        | 0.08            | 242.76                          | 0.11                            | 1.08                           | 11.54               |
| SG-20  | 1343.96                       | 1585.48                       | 2681.39                        | 0.26            | 50.93                           | 0.46                            | 1.37                           | 10.26               |
| SG-40  | 1349.52                       | 1585.24                       | 2687.06                        | 0.75            | 51.53                           | 0.96                            | 0.82                           | 13.26               |
| SG-50  | 1350.80                       | 1588.35                       | 2683.09                        | 0.99            | 31.66                           | 1.32                            | 0.28                           | 22.69               |

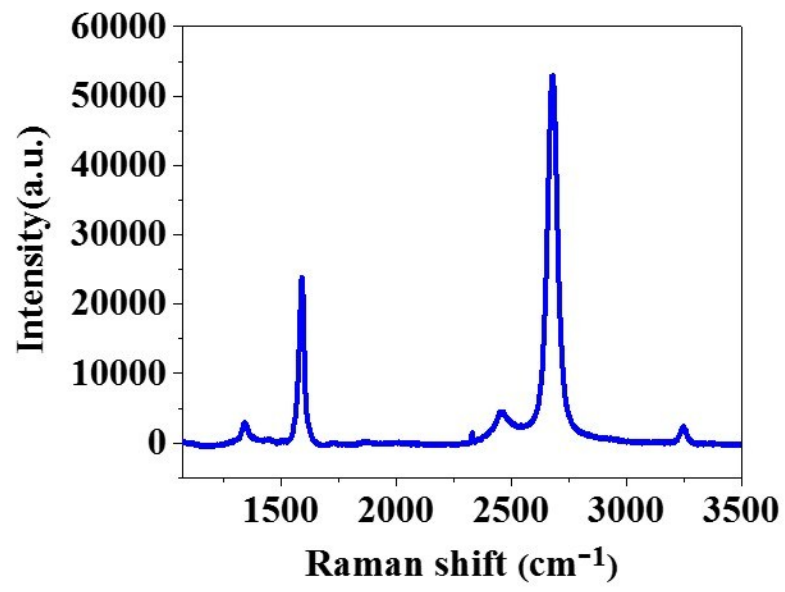

Figure S3. Raman spectra of pristine graphene.

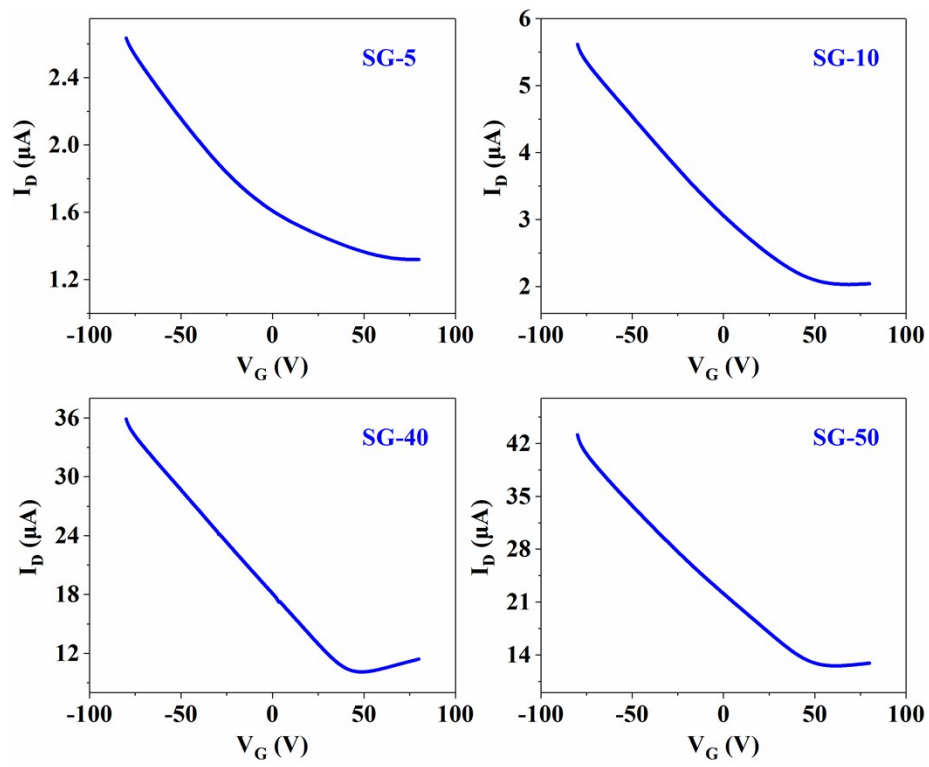

Figure S4. Transfer characteristics of the SG films based FETs.
